# Supplementary material for: Peptide-Resorcinarene Conjugates Obtained via Click Chemistry: Synthesis and Antimicrobial Activity
Source: MDPI journal article supplement (doi:10.3390/antibiotics12040773), 2023-04-18
Supplement: s1 [file s1]

## Peptide-Resorcinarene Conjugates Obtained via Click Chemistry: Synthesis and Antimicrobial Activity

Héctor Manuel Pineda-Castañeda <sup>1</sup>, Mauricio Maldonado-Villamil <sup>1</sup>, Claudia Marcela Parra-Giraldo <sup>2</sup>, Aura Lucía Leal-Castro <sup>1</sup>, Ricardo Fierro-Medina <sup>1</sup>, Zuly Jenny Rivera-Monroy <sup>1</sup> and Javier Eduardo García-Castañeda <sup>1,\*</sup>

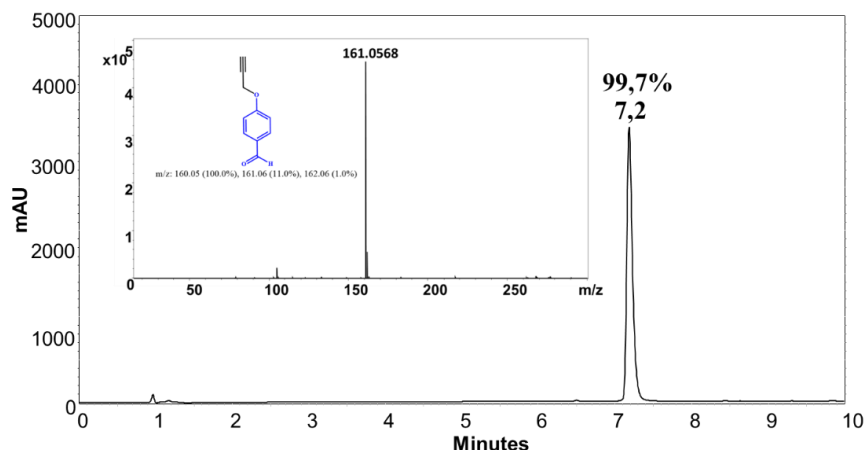

**Figure S1.** Analysis of p-hydroxyphenyl functionalized with the alkyne group (4-(prop-2-yn-1-yloxy)benzaldehyde), chromatographic profile and mass spectra.

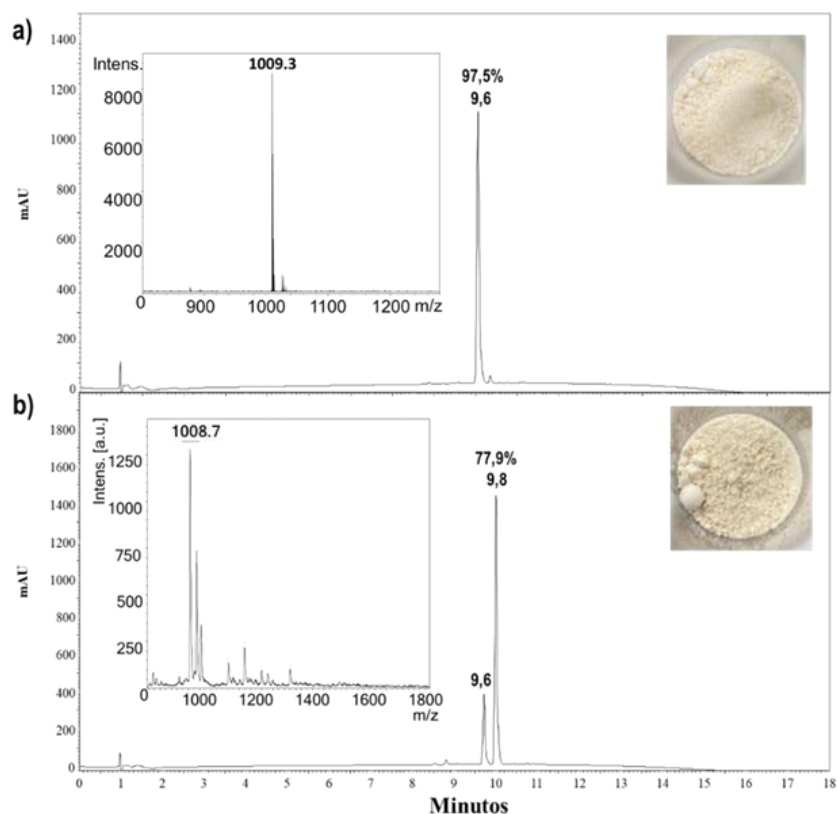

**Figure S2.** Chromatographic profile and mass spectrum of purified a) *rccct*-chair conformer and b) *rrccc*-crown conformer.

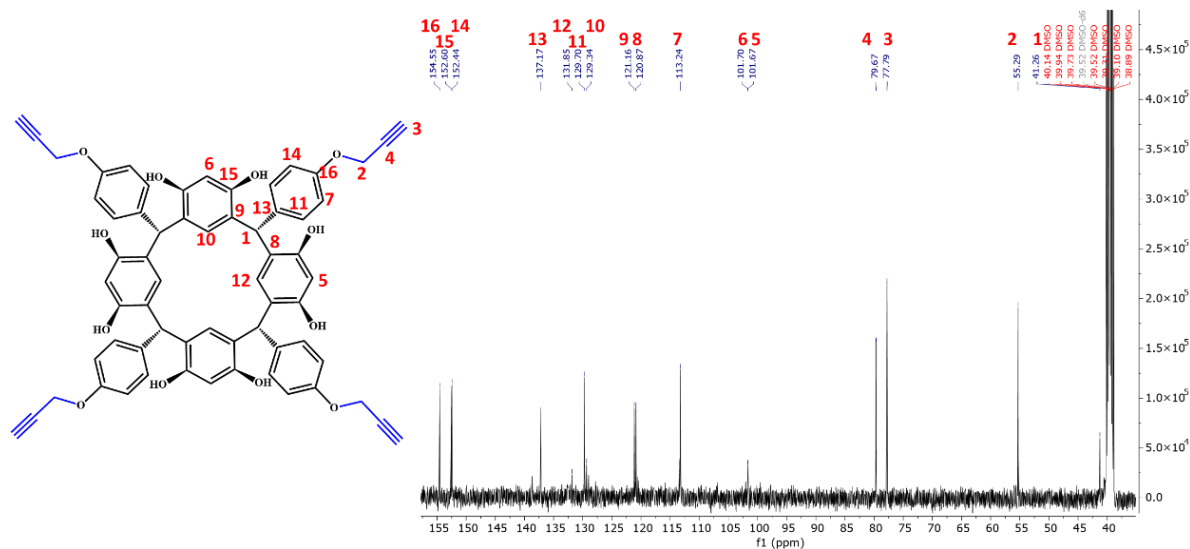

**Figure S3.** Analysis of C-tetra(p-hydroxyphenyl)calix[4]resorcinarene *rctt* functionalized with the alkyne group,  $^{13}\text{C}$ -NMR

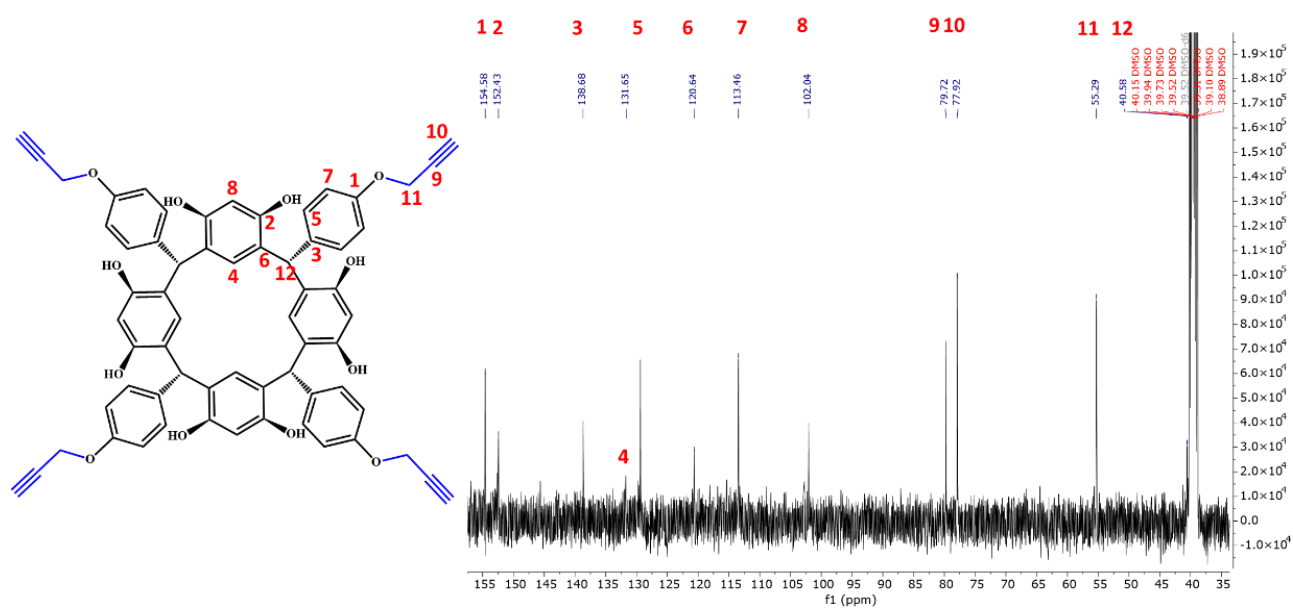

**Figure S4.** C-tetra(p-hydroxyphenyl)calix[4]resorcinarene *rrcc* functionalized with the alkyne group,  $^{13}\text{C}$ -NMR.

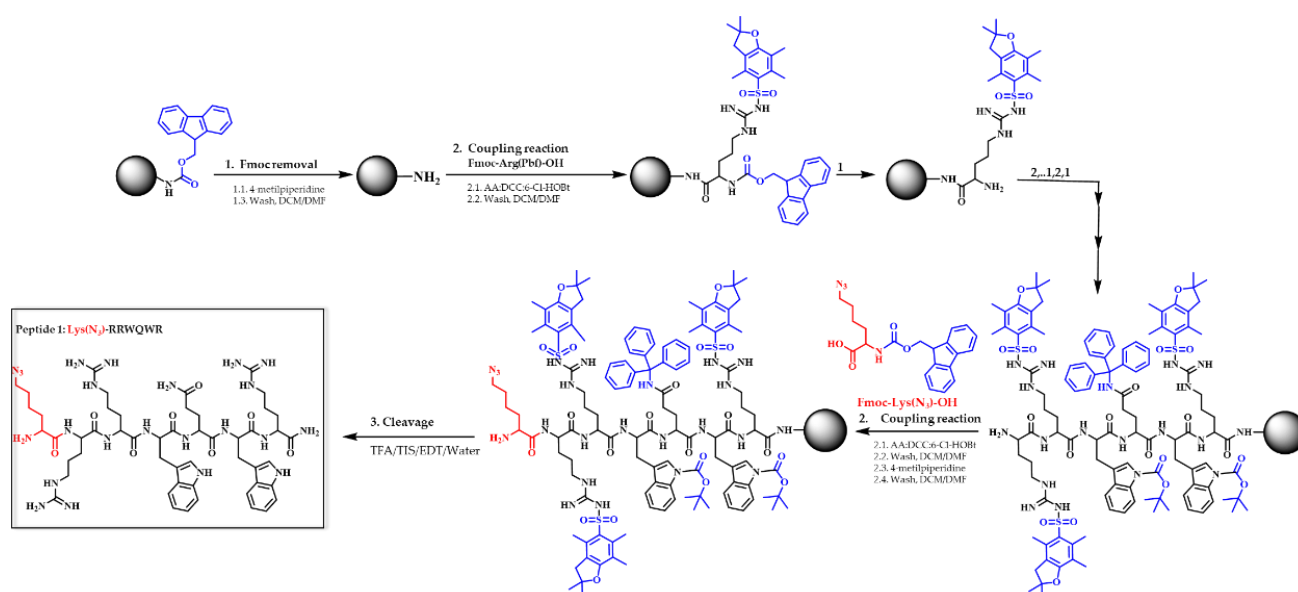

Figure S5. Azide-Peptide synthesis diagram.

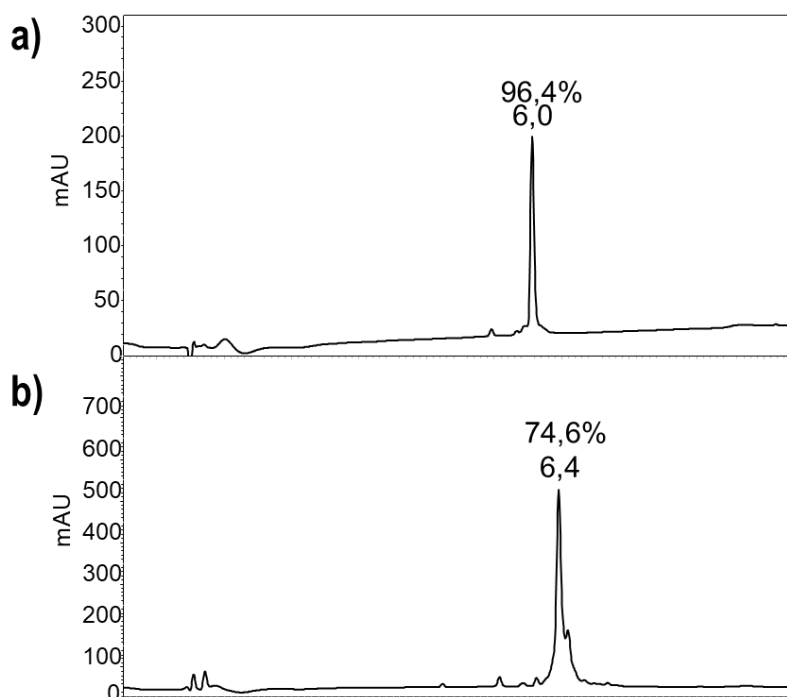Figure S6. Chromatographic profiles of the peptide-resorcinarene conjugates a) CTpH(F)-(AAC-(K)-RLLR)<sub>4</sub> (*rctt*), b) CTpH(F)-(AAC-(K)-RRWQWR)<sub>4</sub> (*rctt*)

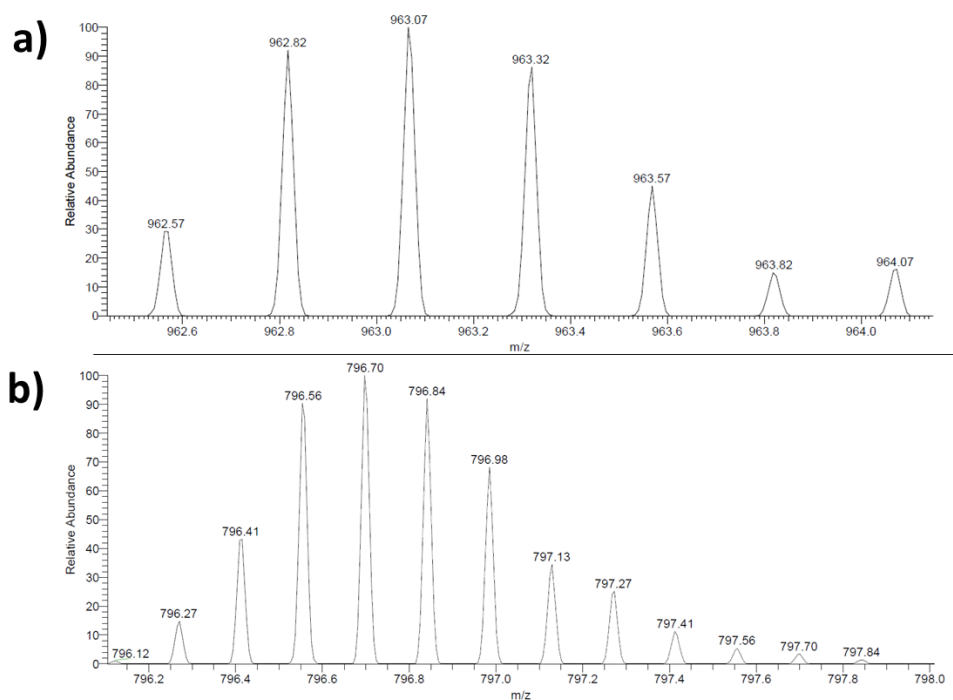

**Figure S7.** HR-MS of the peptide-resorcinarene conjugates a) CTpH(F)-(AAC-(K)-RLLR)<sub>4</sub> (*rctt*), b) CTpH(F)-(AAC-(K)-RRWQWR)<sub>4</sub> (*rctt*)
